# Supplementary material for: Time sensitive, temperature and pH responsive photoluminescence behaviour of a melamine containing bicomponent hydrogel
Source: Royal Society of Chemistry journal article supplement (doi:10.1039/c0sm00036a), 2010-01-01
Supplement: c0sm00036a.pdf [file c0sm00036a.pdf]

**Temperature and pH sensitive photoluminescence behaviour of a melamine  
containing bicomponent hydrogel**

Bappaditya Roy, Abhijit Saha, Aluri Esterrani and Arun K. Nandi\*

Polymer Science Unit, Indian Association for the Cultivation of Science

Jadavpur, Kolkata-700 032, India

ELECTRONIC SUPPORTING INFORMATION

**Contents:**

|                                                                       |          |
|-----------------------------------------------------------------------|----------|
| <b>Figure S1.</b> FESEM microscopy of MQ13 and MQ31 hydrogel .....    | page 2   |
| <b>Figure S2.</b> Temperature ramp in Rheology of the MQ systems..... | page 3   |
| <b>Figure S3.</b> DSC thermograms.....                                | page 4   |
| <b>Figure S4.</b> WAXS spectra of hydrogel and xerogel.....           | Page 5-6 |
| <b>Figure S5.</b> FTIR Spectra.....                                   | page 7   |
| <b>Figure S6.</b> Life Time measurement data.....                     | page 8   |

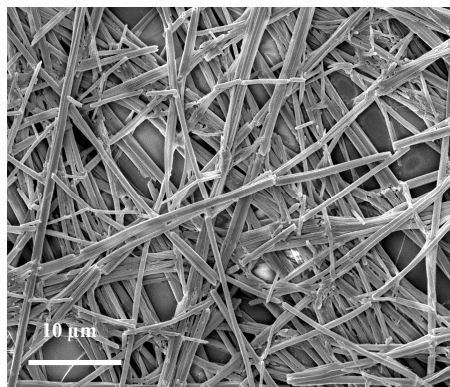

(a)

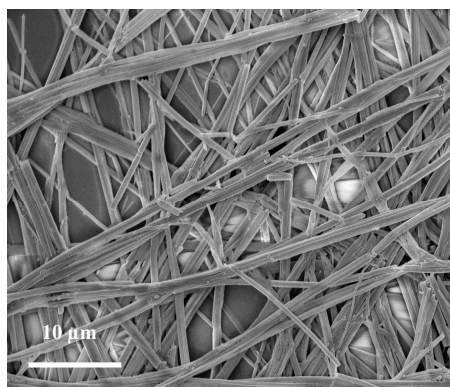

(b)

**Figure S1.** FESEM microscopy image of (a) MQ13 and (b) MQ31 hydrogel system

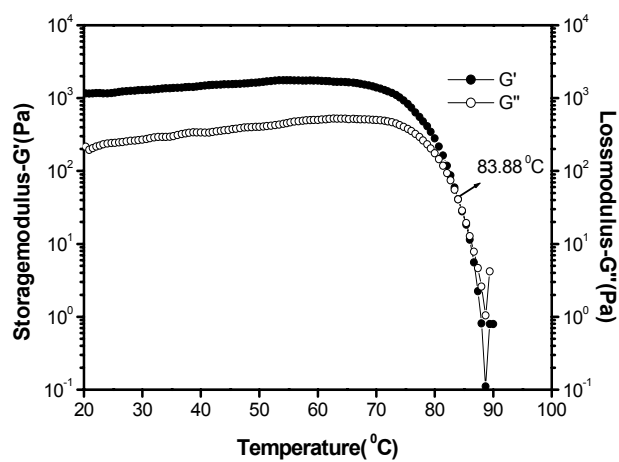

(a)

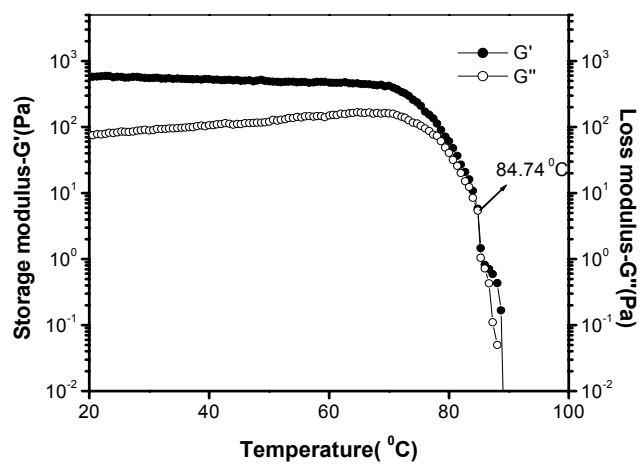

(b)

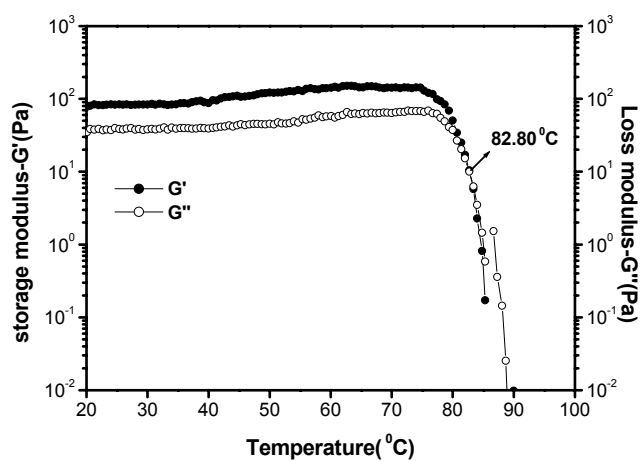

(c)

**Figure S2.** Rheological temperature ramp of (a) MQ11 (b) MQ13 and (c) MQ31 hydrogel (1% w/v, 3 days aged hydrogel)

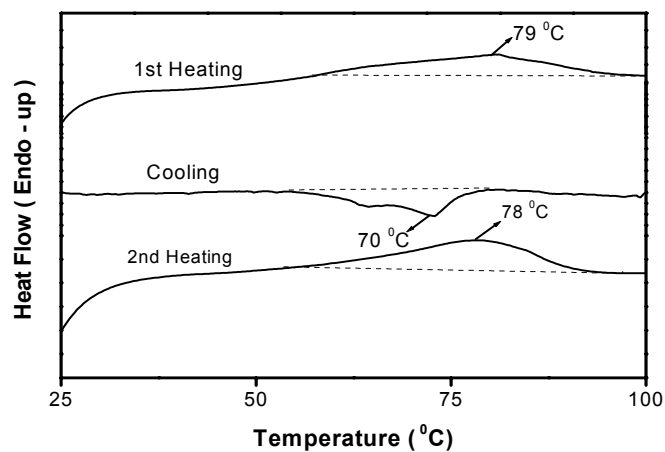

(a)

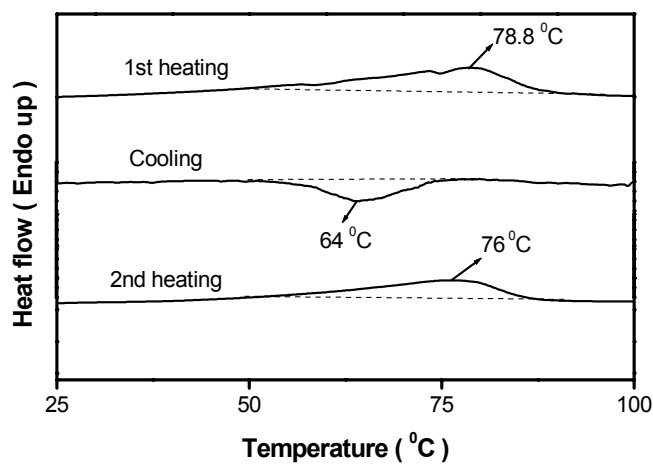

(b)

**Figure S3.** DSC data of (a) MQ13 and (b) MQ31 hydrogel systems (1 %w/v, H<sub>2</sub>O, 3 days aged).

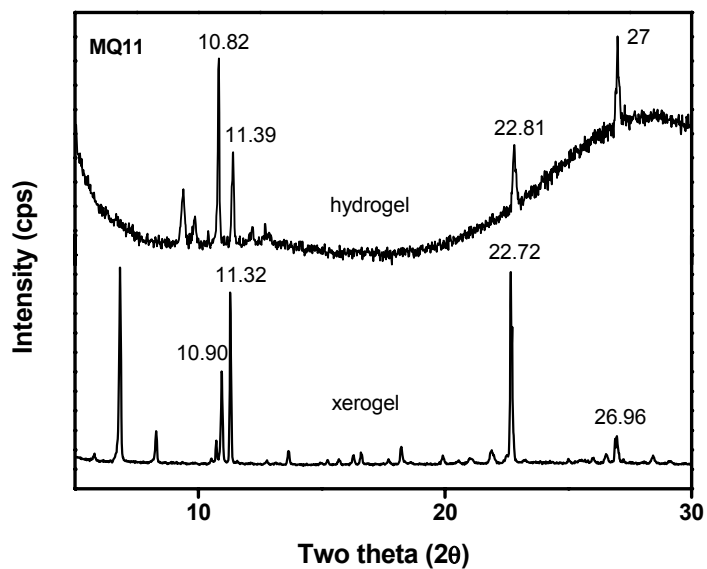

(a)

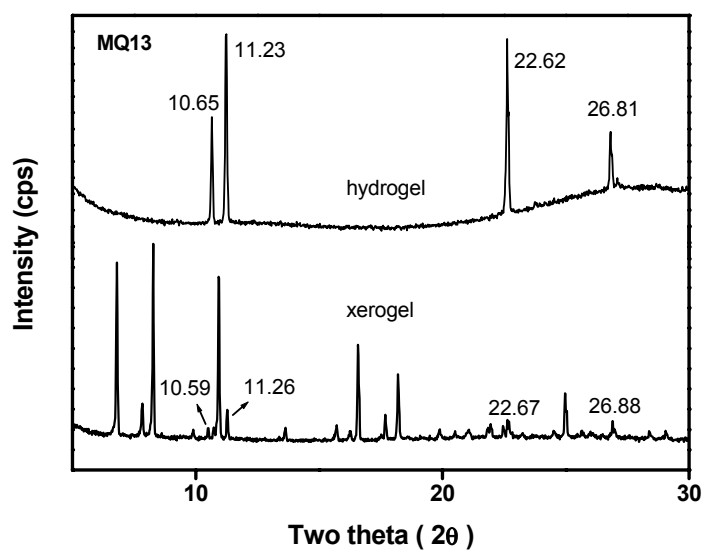

(b)

**Figure S4.** WAXS patterns of hydrogel and xerogel of (a) MQ11 and (b) MQ13 gel system.

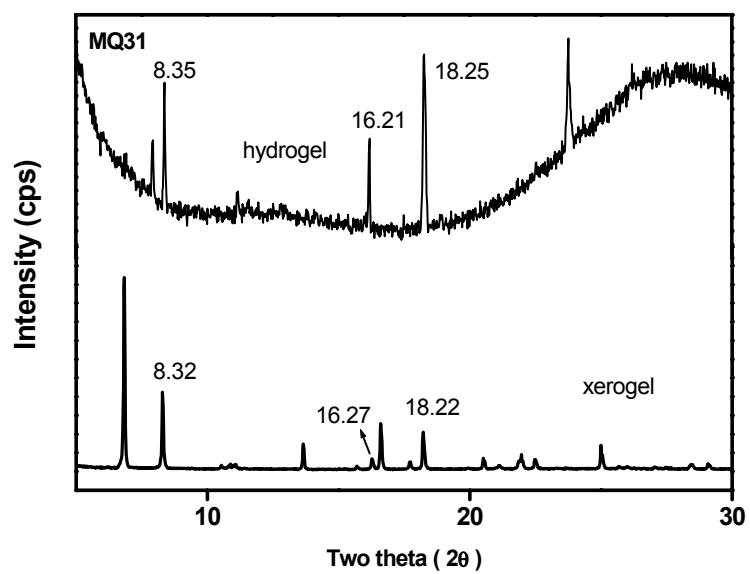

(c)

**Figure S4.** (c) WAXS patterns of hydrogel and xerogel of MQ31 gel system.

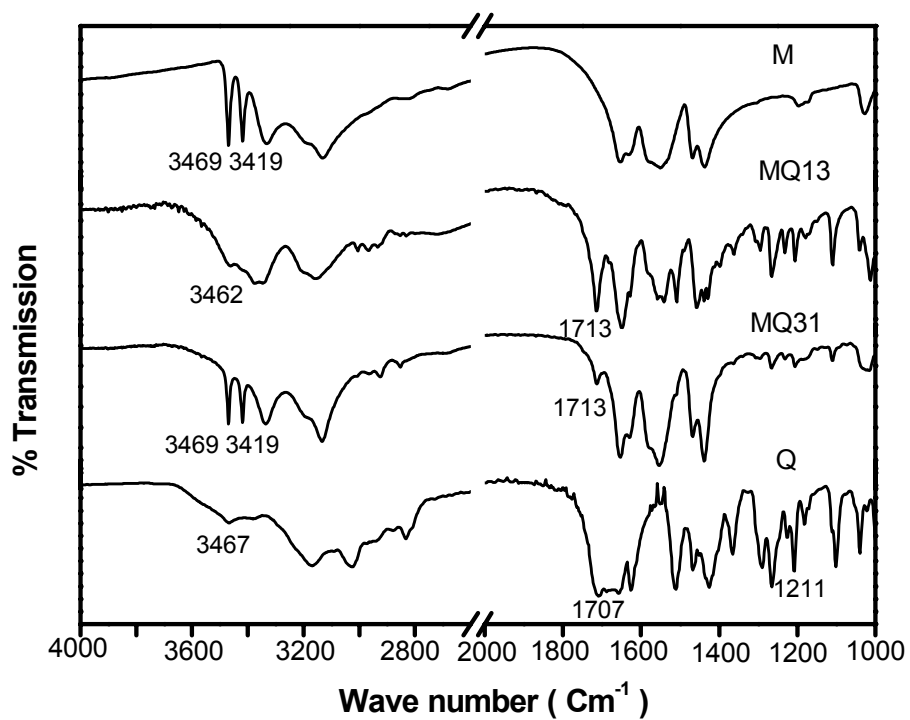

**Figure S5.** FTIR spectra of pure M, Q and xerogels MQ13 and MQ31 (Dried in vacuum for 5 days)

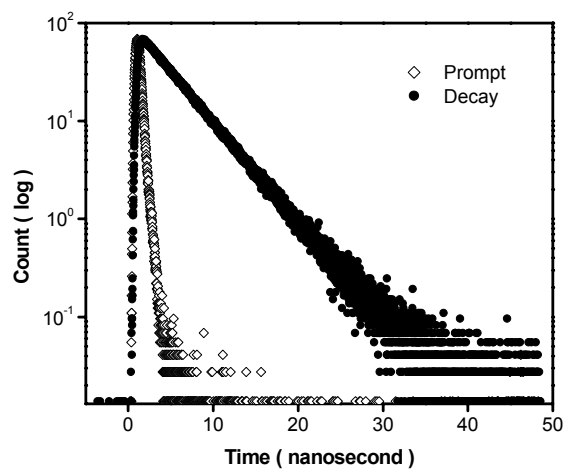

(a)

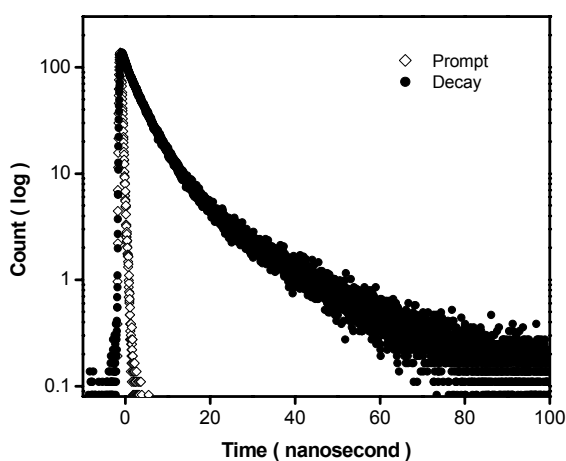

(b)

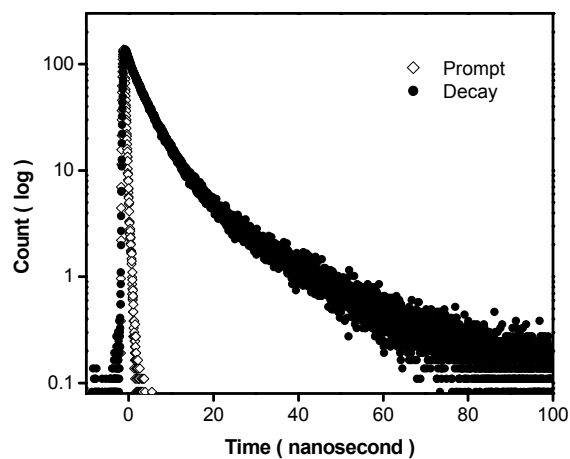

(c)

**Figure S6.** Time-resolved fluorescence decay of (a) Pure Q (b) MQ13 and (c) MQ31 (0.5 % w/v) hydrogel at 25<sup>0</sup>C ( $\lambda_{\text{ex}} = 295$  nm). The sharp profile on the left is the lamp profile.
